# Supplementary material for: Design of novel anti-MRSA inhibitors: a computational study integrating QSAR, ADMET, and molecular dynamics simulations
Source: Royal Society of Chemistry journal article supplement (doi:10.1039/d4nj03247k), 2024-01-01
Supplement: d4nj03247k1.pdf [file d4nj03247k1.pdf]

## Electronic Supplementary Information of *New Journal of Chemistry*

### Design of Novel Anti-MRSA Inhibitors: A Computational Study Integrating QSAR, ADMET, and Molecular Dynamics Simulation

Huiying Jiang,<sup>†a</sup> Jie Xu,<sup>†a</sup> Zhonghua Wang<sup>†b</sup> and Fei Xiong<sup>\*a</sup>

a. Department of Chemistry, University of Shanghai for Science and Technology, Shanghai 200093, P. R. China. E-mail: fxiong@usst.edu.cn.

b. School of Chemical and Environmental Engineering, Shanghai Institute of Technology, Shanghai, P. R. China.

† These authors contributed equally.

Table S1: All results of the 3D-QSAR model's internal validation.

|              |              | Statistical parameters      |                  |                  |                             |                | Fraction of field contributions (%) |             |             |      |      |
|--------------|--------------|-----------------------------|------------------|------------------|-----------------------------|----------------|-------------------------------------|-------------|-------------|------|------|
|              | Model        | q <sup>2</sup> <sup>a</sup> | ONC <sup>b</sup> | SEE <sup>c</sup> | r <sup>2</sup> <sup>d</sup> | F <sup>e</sup> | S                                   | E           | H           | D    | A    |
| Alignment    | (Atom-based) |                             |                  |                  |                             |                |                                     |             |             |      |      |
| <b>CoMFA</b> | <b>S+E</b>   | <b>0.642</b>                | <b>8</b>         | <b>0.172</b>     | <b>0.958</b>                | <b>162.009</b> | <b>39.8</b>                         | <b>60.2</b> |             |      |      |
| CoMSIA       | S+E          | 0.514                       | 4                | 0.199            | 0.954                       | 83.716         | 28.4                                | 71.6        |             |      |      |
|              | S+D          | 0.573                       | 3                | 0.375            | 0.812                       | 53.426         | 52.0                                |             |             | 48.0 |      |
|              | S+A          | 0.502                       | 3                | 0.341            | 0.845                       | 67.308         | 24.3                                |             |             |      | 75.7 |
|              | S+H          | 0.547                       | 10               | 0.176            | 0.967                       | 86.879         | 29.4                                |             | 70.6        |      |      |
|              | E+D          | 0.505                       | 9                | 0.253            | 0.929                       | 44.975         |                                     | 75.4        |             | 24.6 |      |
|              | E+A          | 0.515                       | 3                | 0.325            | 0.859                       | 75.221         |                                     | 41.1        |             |      | 58.9 |
|              | E+H          | 0.554                       | 8                | 0.177            | 0.964                       | 107.502        |                                     | 51.1        | 48.9        |      |      |
|              | D+A          | 0.524                       | 3                | 0.336            | 0.850                       | 69.932         |                                     |             |             | 31.2 | 68.8 |
|              | D+H          | 0.517                       | 5                | 0.332            | 0.861                       | 43.322         |                                     |             | 67.4        | 32.6 |      |
|              | A+H          | 0.565                       | 5                | 0.192            | 0.960                       | 72.218         |                                     |             | 56.1        |      | 43.9 |
|              | S+E+D        | 0.556                       | 8                | 0.214            | 0.947                       | 71.651         | 22.2                                | 59.1        |             | 18.7 |      |
|              | S+E+A        | 0.536                       | 3                | 0.323            | 0.861                       | 76.276         | 15.2                                | 34.4        |             |      | 50.5 |
|              | <b>S+E+H</b> | <b>0.590</b>                | <b>5</b>         | <b>0.250</b>     | <b>0.907</b>                | <b>122.767</b> | <b>15.4</b>                         | <b>56.6</b> | <b>28.0</b> |      |      |
|              | S+D+A        | 0.527                       | 3                | 0.333            | 0.852                       | 71.239         | 15.7                                |             |             | 24.3 | 60.0 |
|              | S+D+H        | 0.589                       | 5                | 0.329            | 0.864                       | 44.452         | 27.7                                |             | 46.5        | 25.7 |      |
|              | S+A+H        | 0.556                       | 10               | 0.181            | 0.965                       | 82.043         | 16.6                                |             | 46.4        |      | 37.0 |
|              | E+D+A        | 0.518                       | 3                | 0.323            | 0.861                       | 76.469         |                                     | 30.9        |             | 20.9 | 48.2 |
|              | E+A+H        | 0.532                       | 5                | 0.206            | 0.953                       | 69.287         |                                     | 34.5        | 32.3        |      | 33.2 |
|              | D+A+H        | 0.567                       | 5                | 0.190            | 0.961                       | 74.016         |                                     |             | 46.3        | 15.8 | 37.9 |
|              | D+H+E        | 0.553                       | 5                | 0.195            | 0.956                       | 87.782         |                                     | 45.7        | 39.5        | 14.8 |      |
|              | S+E+D+A      | 0.565                       | 6                | 0.227            | 0.942                       | 56.350         | 14.5                                | 36.3        |             | 14.2 | 35.0 |
|              | S+E+D+H      | 0.544                       | 4                | 0.180            | 0.963                       | 103.558        | 14.0                                | 40.4        | 33.6        | 12.1 |      |
|              | S+E+A+H      | 0.751                       | 5                | 0.195            | 0.957                       | 77.419         | 11.8                                | 30.8        | 27.3        |      | 30.1 |
|              | S+D+A+H      | 0.742                       | 5                | 0.203            | 0.954                       | 71.496         | 13.7                                |             | 37.3        | 15.2 | 33.7 |

Table S1 Continued

|           |       |   |       |       |        |      |      |      |      |      |
|-----------|-------|---|-------|-------|--------|------|------|------|------|------|
| E+D+A+H   | 0.745 | 5 | 0.211 | 0.950 | 66.067 | 30.6 | 27.3 | 12.2 | 30.0 |      |
| S+E+D+A+H | 0.576 | 5 | 0.196 | 0.957 | 77.195 | 10.4 | 27.8 | 24.0 | 10.3 | 27.6 |

Table S2 The list of all the molecules with their SMILES notation

| No | SMILES                                                  |
|----|---------------------------------------------------------|
| 01 | <chem>FS(=O)(=O)\C=C\C1=CC=CC=C1</chem>                 |
| 02 | <chem>CC1=CC=C(\C=C\S(F)(=O)=O)C=C1</chem>              |
| 03 | <chem>CCC1=CC=C(\C=C\S(F)(=O)=O)C=C1</chem>             |
| 04 | <chem>FS(=O)(=O)\C=C\C1=CC=C(OC2=CC=CC=C2)C=C1</chem>   |
| 05 | <chem>COC1=CC=C(\C=C\S(F)(=O)=O)C=C1</chem>             |
| 06 | <chem>FS(=O)(=O)\C=C\C1=CC=C(C=C1)C1=CC=CC=C1</chem>    |
| 07 | <chem>FC1=CC=C(\C=C\S(F)(=O)=O)C=C1</chem>              |
| 08 | <chem>FS(=O)(=O)\C=C\C1=CC=C(Cl)C=C1</chem>             |
| 09 | <chem>FS(=O)(=O)\C=C\C1=CC=C(Br)C=C1</chem>             |
| 10 | <chem>FS(=O)(=O)\C=C\C1=CC=C(I)C=C1</chem>              |
| 11 | <chem>FC(F)(F)OC1=CC=C(\C=C\S(F)(=O)=O)C=C1</chem>      |
| 12 | <chem>FC(F)(F)C1=CC=C(\C=C\S(F)(=O)=O)C=C1</chem>       |
| 13 | <chem>CC(=O)C1=CC=C(\C=C\S(F)(=O)=O)C=C1</chem>         |
| 14 | <chem>[O-][N+](=O)C1=CC=C(\C=C\S(F)(=O)=O)C=C1</chem>   |
| 15 | <chem>FS(=O)(=O)\C=C\C1=CC=C(C=C1)C#N</chem>            |
| 16 | <chem>OC(=O)C1=CC=C(\C=C\S(F)(=O)=O)C=C1</chem>         |
| 17 | <chem>CCOC(=O)C1=CC=C(\C=C\S(F)(=O)=O)C=C1</chem>       |
| 18 | <chem>FS(=O)(=O)\C=C\C1=CC=C(C=O)C=C1</chem>            |
| 19 | <chem>OC1=CC=C(\C=C\S(F)(=O)=O)C=C1</chem>              |
| 20 | <chem>CSC1=CC=C(\C=C\S(F)(=O)=O)C=C1</chem>             |
| 21 | <chem>CS(=O)(=O)C1=CC=C(\C=C\S(F)(=O)=O)C=C1</chem>     |
| 22 | <chem>CC(C)S(=O)(=O)C1=CC=C(\C=C\S(F)(=O)=O)C=C1</chem> |
| 23 | <chem>COC1=CC(\C=C\S(F)(=O)=O)=CC=C1</chem>             |
| 24 | <chem>CC1=CC(\C=C\S(F)(=O)=O)=CC=C1</chem>              |
| 25 | <chem>CC(C)C1=CC(\C=C\S(F)(=O)=O)=CC=C1</chem>          |
| 26 | <chem>FS(=O)(=O)\C=C\C1=CC=CC(=C1)C1=CC=CC=C1</chem>    |
| 27 | <chem>FC1=CC(\C=C\S(F)(=O)=O)=CC=C1</chem>              |
| 28 | <chem>FS(=O)(=O)\C=C\C1=CC=CC(Br)=C1</chem>             |
| 29 | <chem>FS(=O)(=O)\C=C\C1=CC=CC(I)=C1</chem>              |
| 30 | <chem>FC(F)(F)C1=CC(\C=C\S(F)(=O)=O)=CC=C1</chem>       |
| 31 | <chem>FS(=O)(=O)\C=C\C1=CC=CC(C=O)=C1</chem>            |
| 32 | <chem>CC(=O)C1=CC(\C=C\S(F)(=O)=O)=CC=C1</chem>         |
| 33 | <chem>[O-][N+](=O)C1=CC(\C=C\S(F)(=O)=O)=CC=C1</chem>   |
| 34 | <chem>OC1=CC(\C=C\S(F)(=O)=O)=CC=C</chem>               |
| 35 | <chem>CCOC(=O)C1=CC(\C=C\S(F)(=O)=O)=CC=C1</chem>       |

|    |                                                  |
|----|--------------------------------------------------|
| 36 | CS(=O)(=O)C1=CC(\C=C\S(F)(=O)=O)=CC=C1           |
| 37 | COC1=CC=CC=C1\C=C\S(F)(=O)=O                     |
| 38 | CC1=CC=CC=C1\C=C\S(F)(=O)=O                      |
| 39 | FS(=O)(=O)\C=C\C1=CC=CC=C1Br                     |
| 40 | CC(=O)C1=CC=CC=C1\C=C\S(F)(=O)=O                 |
| 41 | FS(=O)(=O)\C=C\C1=CC=CC=C1C=O                    |
| 42 | OC1=CC=CC=C1\C=C\S(F)(=O)=O                      |
| 43 | FS(=O)(=O)C=CC1=CC=CC2=CC=CC=C12                 |
| 44 | FS(=O)(=O)\C=C\C1=CC=C2C=CC=CC2=C1               |
| 45 | CC1=CC=C(\C=C\S(F)(=O)=O)C(C)                    |
| 46 | FC1=CC=C(\C=C\S(F)(=O)=O)C(F)=C1                 |
| 47 | CC1=CC(\C=C\S(F)(=O)=O)=CC(C)=C1                 |
| 48 | COC1=CC(\C=C\S(F)(=O)=O)=CC(OC)=C1               |
| 49 | FC(F)(F)C1=CC(=CC(\C=C\S(F)(=O)=O)=C1)C(F)(F)F   |
| 50 | OC1=CC(\C=C\S(F)(=O)=O)=CC(O)=C1                 |
| 51 | FS(=O)(=O)\C=C\C1=CC(Cl)=CC(Cl)=C1               |
| 52 | COC1=CC=C(Cl)C=C1\C=C\S(F)(=O)=O                 |
| 53 | CC1=C(Br)C=CC(\C=C\S(F)(=O)=O)=C1                |
| 54 | FS(=O)(=O)\C=C\C1=CC(\C=C\S(F)(=O)=O)=CC=C1      |
| 55 | FS(=O)(=O)\C=C\C1=CC=C(O1)C=O                    |
| 56 | FS(=O)(=O)\C=C\C1=CC=CC2=C1OC1=CC=CC=C21         |
| 57 | FS(=O)(=O)\C=C\C1=COC2=CC=CC=C12                 |
| 58 | FS(=O)(=O)\C=C\C1=CC=CS1                         |
| 59 | FS(=O)(=O)\C=C\C1=CSC=C1                         |
| 60 | FS(=O)(=O)\C=C\C1=CC2=CC=CC=C2S1                 |
| 61 | FS(=O)(=O)\C=C\C1=CC=CC2=C1SC1=CC=CC=C21         |
| 62 | S=[3H]N1C(\C=C\S(F)(=O)=O)=CC2=CC=CC=C12         |
| 63 | S=[3H]N1C=CC2=CC(\C=C/S(F)(=O)=O)=CC=C12         |
| 64 | S=[3H]N1C2=CC=CC=C2C2=C1C=CC(\C=C\S(F)(=O)=O)=C2 |
| 65 | FS(=O)(=O)\C=C\C1=CN(N=C1)C1=CC=CC=C1            |
| 66 | FC(F)(F)C1=CC=C(\C=C\S(F)(=O)=O)C=N1             |
| 67 | FS(=O)(=O)\C=C\C1=CC(Cl)=NC(Cl)=C1               |
| 68 | FS(=O)(=O)\C=C\C=C\C1=CC=CC=C1                   |
| 69 | CC1=CC=C(\C=C\C=C\S(F)(=O)=O)C=C1                |
| 70 | CC(C)(C)C1=CC=C(\C=C\C=C\S(F)(=O)=O)C=C1         |
| 71 | FS(=O)(=O)\C=C\C=C\C1=CC=C(Br)C=C1               |
| 72 | FC(F)(F)C1=CC=C(\C=C\C=C\S(F)(=O)=O)C=C1         |
| 73 | FS(=O)(=O)\C=C\C=C\C1=CC=CC(Br)=C1               |
| 74 | FC1=CC(\C=C\C=C\S(F)(=O)=O)=CC=C1                |
| 75 | FS(=O)(=O)\C=C\C=C\C1=CC=CC(=C1)C#N              |
| 76 | [O-][N+](=O)C1=CC=CC=C1\C=C\C=C\S(F)(=O)=O       |
| 77 | CC1=CC=CC=C1\C=C\C=C\S(F)(=O)=O                  |
| 78 | FS(=O)(=O)\C=C\C=C\C1=CC2=C(C=CC=C2)C=C1         |

|    |                                                     |
|----|-----------------------------------------------------|
| 79 | <chem>COC1=CC(\C=C\C=C\S(F)(=O)=O)=CC(OC)=C1</chem> |
| 80 | <chem>FC1=CC=C(\C=C\C=C\S(F)(=O)=O)C=C1F</chem>     |
| 81 | <chem>CCOC(=O)\C=C\C=C\S(F)(=O)=O</chem>            |
| 82 | <chem>CCOC(=O)\C=C\C=C\S(F)(=O)=O</chem>            |

Table S2 Continued (New designed molecules)

|     |                                                                                     |
|-----|-------------------------------------------------------------------------------------|
| N01 | <chem>OC(=O)C1=C(C=C\C=C\S(F)(=O)=O)C(C2=CC=CC=C2)=C1C(F)(F)F)C(F)(F)F</chem>       |
| N02 | <chem>[O]S(=O)(=O)C1=C(C=C\C=C\S(F)(=O)=O)C(C2=CC=NC=C2)=C1C(F)(F)F)C(F)(F)F</chem> |
| N03 | <chem>[O]S(=O)(=O)C1=C(C=C\C=C\S(F)(=O)=O)C(C2=CC=CC=C2)=C1C(F)(F)F)C(F)(F)F</chem> |
| N04 | <chem>[O]S(=O)(=O)C1=C(C=C\C=C\S(F)(=O)=O)C(N2CC[N]CC2)=C1C(F)(F)F)C(F)(F)F</chem>  |
| N05 | <chem>OC(=O)C1=C(C=C\C=C\S(F)(=O)=O)C(C2=CC=NC=C2)=C1C(F)(F)F)C(F)(F)F</chem>       |
| N06 | <chem>CC(C)(C)C1=C(C(=C(C=C1\C=C\S(F)(=O)=O)C(F)(F)F)[N+])([O-])=O)C(F)(F)F</chem>  |
| N07 | <chem>CC(C)(C)C1=C(C(=C(C=C1\C=C\S(F)(=O)=O)C(F)(F)F)S([O])(=O)=O)C(F)(F)F</chem>   |
| N08 | <chem>[O-][N+](=O)C1=C(C=C\C=C\S(F)(=O)=O)C(N2CC[N]CC2)=C1C(F)(F)F)C(F)(F)F</chem>  |

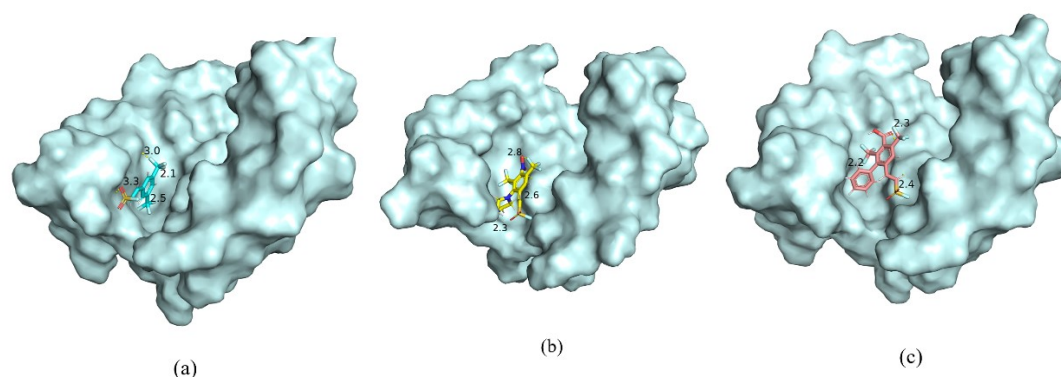

Fig. S1 Root Mean Square Deviation (RMSD) of both the ligand and the binding cavity.  
(a)2FNP-49. (b)2FNP-N06. (c)2FNP-N07

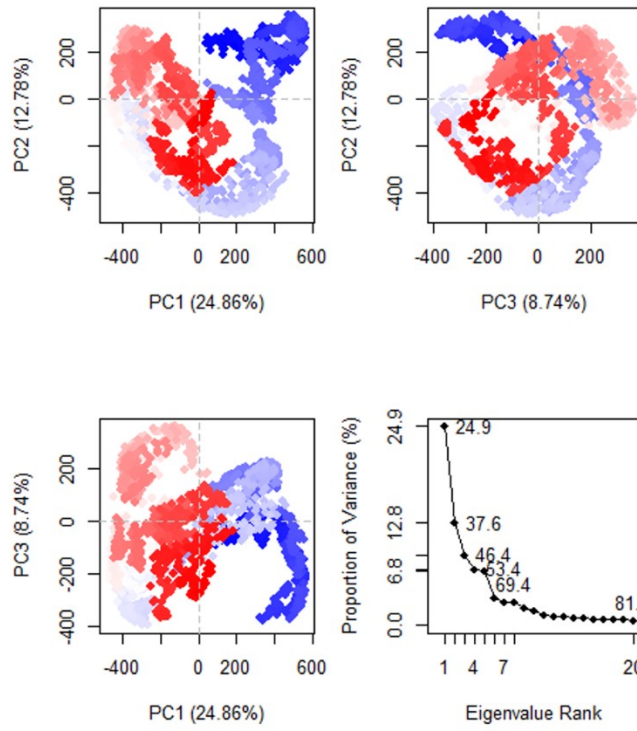

(a)

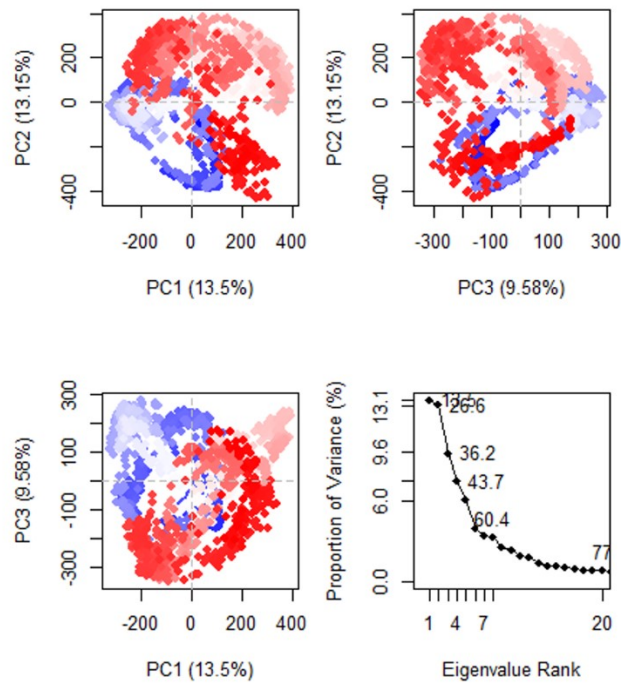

(b)

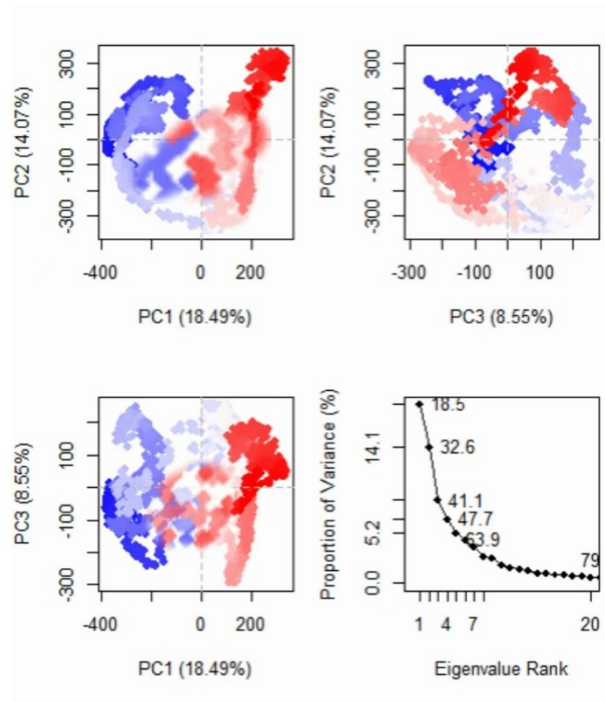

(c)

Fig. S2 Principal component analysis (PCA) of composite components. (a)2FNP-49. (b)2FNP-N06. (c)2FNP-N07
